# Supplementary material
Source: PubMed Central journal article supplement (PMC4207130)
Supplement: jp508342x_si_001.pdf [file jp508342x_si_001.pdf]

A Simple and Fast Approach for Predicting  $^1\text{H}$  and  $^{13}\text{C}$  Chemical Shifts: Toward Chemical Shift-Guided Simulations of RNA.

Aaron T. Frank\*, Sean M. Law and Charles L. Brooks III\*

Department of Chemistry and Biophysics, University of Michigan, 930 North University Avenue, Ann Arbor, MI 48109-1055, United States

\*Email: [afrankz@umich.edu](mailto:afrankz@umich.edu)  
[brooksc1@umich.edu](mailto:brooksc1@umich.edu)

**Table S1. Training Set.** PDB and BMRB accession codes for NMR structures and chemical shifts for the RNA used to train LARMOR<sup>D</sup>. Also included are the sample conditions under which spectra were assigned, the number of residues and brief description of each RNA.

| PDBID | BMRB  | T(K) | pH  | #residues | Description                                                                      |
|-------|-------|------|-----|-----------|----------------------------------------------------------------------------------|
| 1KKA  | 5256  | 298  | 6.8 | 17        | Anticodon Stem-Loop Of tRNA (Phe)                                                |
| 1L1W  | 5321  | 298  | 6.5 | 29        | Helix 6 Of Signal Recognition Particle RNA                                       |
| 1LC6  | 5371  | 303  | 7.0 | 24        | U6 RNA                                                                           |
| 1LDZ  | 4226  | 298  | 5.5 | 30        | Lead-Dependent Ribozyme                                                          |
| 1NC0  | 5655  | 303  | 6.5 | 24        | U80g U6 ISL RNA                                                                  |
| 1OW9  | 5852  | 298  | 7.0 | 23        | A Mimic Of The VS Ribozyme Hairpin Substrate                                     |
| 1PJY  | 5834  | 298  | 6.8 | 22        | HIV-1 Frameshift Inducing Stem-Loop RNA                                          |
| 1R7W  | 6076  | 298  | 6.5 | 34        | stem-loop IV domain of the enterovirus IRES                                      |
| 1R7Z  | 6077  | 298  | 6.5 | 34        | stem-loop IV domain of the enterovirus IRES                                      |
| 1YSV  | 6485  | 303  | 6.0 | 27        | Glur-B R/G RNA                                                                   |
| 2FDT  | 10018 | 293  | 6.0 | 36        | RNA Hairpin Of Eel LINE                                                          |
| 2GM0  | 7098  | 303  | 6.4 | 70        | SL1 RNA in the HIV-1 DIS                                                         |
| 2JXQ  | 15571 | 298  | 6.8 | 20        | RNA Duplex                                                                       |
| 2JXS  | 15572 | 298  | 6.8 | 21        | RNA Duplex Containing Single A-Bulge                                             |
| 2K3Z  | 15780 | 298  | 6.8 | 17        | RNA Duplex with the C:G-A triple platform                                        |
| 2K41  | 15781 | 298  | 6.8 | 17        | RNA Duplex with single U-Bulge                                                   |
| 2KOC  | 5705  | 298  | 6.3 | 14        | UUCG Tetraloop                                                                   |
| 2KYD  | 16980 | 303  | 6.5 | 32        | RNA Duplex                                                                       |
| 2LBJ  | 17563 | 298  | 6.2 | 17        | glycyl-tRNA Anticodon Stem-loop                                                  |
| 2LBL  | 17565 | 298  | 6.2 | 17        | Unmodified Glycyl-tRNA(UCC) anticodon stem-loop                                  |
| 2LDL  | 17671 | 303  | 5.5 | 27        | HIV-1 ESS3                                                                       |
| 2LDT  | 17682 | 293  | 6.4 | 31        | Helix-27 from <i>E. coli</i> 16S rRNA                                            |
| 2LHP  | 17860 | 298  | 6.2 | 37        | helix H1 of the Chimpanzee HAR1 RNA                                              |
| 2LI4  | 17877 | 293  | 6.8 | 32        | RNA (32-MER)                                                                     |
| 2LK3  | 17972 | 298  | 7.0 | 24        | U2/U6snRNA                                                                       |
| 2LP9  | 18239 | 298  | 7.0 | 16        | Subgenomic Promoter Of Brome Mosaic Virus                                        |
| 2LPA  | 18240 | 298  | 7.0 | 15        | Mutant sub-genomic promoter of Brome Mosaic Virus                                |
| 2LU0  | 18503 | 300  | 6.7 | 49        | $\kappa$ - $\zeta$ region of <i>S.cerevisiae</i> group II intron ai5( $\gamma$ ) |
| 2LUB  | 18515 | 298  | 6.2 | 37        | Helix H1 Of The Human HAR1 RNA                                                   |
| 2LV0  | 18549 | 298  | 6.8 | 24        | Helix-35 Stem-Loop From <i>E. Coli</i> 23S rRNA                                  |
| 2RN1  | 11014 | 298  | 6.6 | 32        | TAR-TAR*GA Aptamer Kissing Complex                                               |
| 2Y95  | 16714 | 298  | 6.0 | 14        | AUCG Tetraloop                                                                   |
| 4A4S  | 18036 | 298  | 7.0 | 22        | UCAC Tetraloop                                                                   |
| 4A4T  | 18034 | 298  | 7.0 | 22        | UUAC Tetraloop                                                                   |
| 4A4U  | 18035 | 298  | 7.0 | 22        | UGAC Tetraloop                                                                   |

**Table S2. Testing Set.** PDB and BMRB accession codes for NMR structures and chemical shifts for the RNA in the testing set. Also included are the sample conditions under which spectra were assigned, the number of residues and brief description of each RNA.

| PDBID | BMRB  | T(K) | pH  | #residues | Description                                                        |
|-------|-------|------|-----|-----------|--------------------------------------------------------------------|
| 1SCL  | 1SCL  | 303  | 7.6 | 29        | SRL from 28S rRNA                                                  |
| 1XHP  | 6320  | 283  | 6.4 | 32        | U6 Extended ISL                                                    |
| 1Z2J  | 6543  | 303  | 6.8 | 45        | HIV-1 frameshift inducing RNA                                      |
| 1ZC5  | 6633  | 283  | 6.4 | 41        | HIV-1 Frameshift RNA signal                                        |
| 2JWV  | 15538 | 298  | 7.0 | 29        | anti-NF- $\kappa$ B RNA aptamer                                    |
| 2K63  | 15856 | 293  | 6.8 | 29        | D3'-hairpin with EBS1 of group II intron Sc.ai5( $\gamma$ )        |
| 2K64  | 15857 | 288  | 6.8 | 36        | EBS1 + IBS1 of group II intron Sc.ai5( $\gamma$ )                  |
| 2K65  | 15858 | 288  | 6.7 | 14        | EBS1/IBS1 of the group II intron Sc.ai5( $\gamma$ )                |
| 2K66  | 15859 | 293  | 6.5 | 22        | D3'-stem of the group II intron Sc.ai5( $\gamma$ )                 |
| 2LI4  | 17877 | 303  | 6.8 | 32        | antiterminator hairpin from a Mg <sup>2+</sup> riboswitch          |
| 2LPS  | 5962  | 303  | 6.7 | 34        | domain 5 of the ai5( $\gamma$ ) group II intron                    |
| 2LQZ  | 18336 | 298  | 6.5 | 27        | RNA claw of the $\Phi$ 29 DNA packaging motor                      |
| 2LUN  | 18532 | 273  | 6.8 | 28        | RNA Aptamer for <i>B. anthracis</i> Ribosomal Protein S8           |
| 2LX1  | 18656 | 274  | 6.1 | 22        | RNA switch with 5'GAGU/3'UGAG internal loop                        |
| 2M12  | 18838 | 277  | 6.4 | 23        | ID3 stem loop of domain 1 in the ai5( $\gamma$ ) group II intron   |
| 2M21  | 18891 | 298  | 6.3 | 21        | Tetrahymena telomerase RNA stem IV terminal loop                   |
| 2M22  | 18892 | 298  | 6.3 | 23        | helix II TBE from Tetrahymena telomerase RNA                       |
| 2M23  | 18893 | 298  | 6.8 | 36        | D3'-hairpin with EBS1 + IBS1 of group II intron Sc.ai5( $\gamma$ ) |
| 2M24  | 18894 | 293  | 6.8 | 29        | D3'-hairpin with EBS1 of group II intron Sc.ai5( $\gamma$ )        |
| 2M8K  | 19260 | 283  | 6.3 | 48        | <i>K. lactis</i> telomerase RNA pseudoknot                         |
| 2MEQ  | 18975 | 298  | 7.3 | 19        | Helix 69 from <i>E. coli</i> 23S rRNA                              |
| 2MHI  | 19634 | 293  | 6.3 | 53        | CR4/5 domain of medaka telomerase RNA                              |
| 2MI0  | 19662 | 298  | 7.0 | 43        | I-V kissing-loop interaction of the Neurospora VS ribozyme         |
| 2MIS  | 19692 | 273  | 6.5 | 26        | Cations at the Active Site of the Neurospora VS Ribozyme           |
| 2QH2  | 7403  | 283  | 6.3 | 24        | Telomerase RNA CR7                                                 |
| 2QH3  | 7404  | 283  | 6.3 | 23        | Human U64 H/ACA snoRNA                                             |
| 2QH4  | 7405  | 283  | 6.3 | 18        | Human U85 C/D-H/ACA scaRNA                                         |

**Table S3. Outliers in Datasets.** Shown are entries in the training and testing sets identified as outliers using the  $3\sigma$ -rule.

| PDBID | Residue name | Residue | Nucleus | $\delta$ (ppm) | BMRB  |
|-------|--------------|---------|---------|----------------|-------|
| 1KKA  | ADE          | 9       | H5''    | 3.51           | 5256  |
| 1KKA  | CYT          | 15      | H6      | 8.46           | 5256  |
| 1KKA  | CYT          | 16      | H6      | 8.46           | 5256  |
| 1KKA  | ADE          | 9       | H4'     | 3.7            | 5256  |
| 1LC6  | ADE          | 21      | H4'     | 5.288          | 5371  |
| 1LDZ  | ADE          | 25      | C8      | 143            | 4226  |
| 1LDZ  | CYT          | 11      | H5''    | 4.59           | 4226  |
| 1PJY  | CYT          | 8       | C2'     | 93.761         | 5834  |
| 1R7W  | CYT          | 23      | C1'     | 95.481         | 6076  |
| 1R7W  | ADE          | 15      | H5''    | 4.64           | 6076  |
| 1R7Z  | CYT          | 11      | C5      | 141.052        | 6077  |
| 1R7Z  | ADE          | 15      | H5''    | 4.64           | 6077  |
| 1R7Z  | CYT          | 23      | H1'     | 3.769          | 6077  |
| 1SCL  | CYT          | 8       | H5      | 4.886          | 1SCL  |
| 1SCL  | GUA          | 10      | C3'     | 81.522         | 1SCL  |
| 1SCL  | GUA          | 10      | C1'     | 83.55          | 1SCL  |
| 1SCL  | ADE          | 9       | C2'     | 80.256         | 1SCL  |
| 1SCL  | URA          | 11      | C2'     | 72.149         | 1SCL  |
| 1SCL  | ADE          | 20      | H2'     | 5.126          | 1SCL  |
| 1SCL  | URA          | 7       | H3'     | 3.964          | 1SCL  |
| 1SCL  | GUA          | 18      | H3'     | 3.893          | 1SCL  |
| 1UUU  | CYT          | 16      | C4'     | 80.18          | 1UUU  |
| 1UUU  | CYT          | 19      | C3'     | 68.14          | 1UUU  |
| 1Z2J  | CYT          | 21      | H4'     | 3.613          | 6543  |
| 1ZC5  | ADE          | 18      | C2'     | 72.55          | 6633  |
| 2FDT  | ADE          | 22      | H1'     | 4.98           | 10018 |
| 2JWV  | ADE          | 2       | C5      | 68.677         | 15538 |
| 2JWV  | URA          | 3       | C5'     | 69.963         | 15538 |
| 2JWV  | ADE          | 17      | H3'     | 5.424          | 15538 |
| 2JXS  | GUA          | 1       | C5'     | 62.2           | 15572 |
| 2JYM  | ADE          | 19      | C4'     | 80.33          | 15745 |
| 2JYM  | ADE          | 19      | C5'     | 63.24          | 15745 |
| 2JYM  | GUA          | 20      | C4'     | 80.44          | 15745 |
| 2JYM  | GUA          | 12      | H4'     | 4              | 15745 |
| 2JYM  | CYT          | 22      | H3'     | 4.99           | 15745 |
| 2K41  | GUA          | 9       | C2'     | 78.02          | 15781 |
| 2K41  | CYT          | 10      | C5'     | 61.98          | 15781 |
| 2K63  | CYT          | 26      | C6      | 136            | 15856 |
| 2K64  | ADE          | 10      | C1'     | 87             | 15857 |
| 2K64  | URA          | 9       | C6      | 134.55         | 15857 |
| 2K64  | CYT          | 29      | H3'     | 3.91           | 15857 |
| 2K64  | URA          | 11      | C1'     | 88.07          | 15857 |
| 2K64  | CYT          | 26      | C5      | 94.42          | 15857 |
| 2K64  | URA          | 24      | C5      | 100.03         | 15857 |
| 2K64  | ADE          | 6       | C8      | 136.07         | 15857 |
| 2KOC  | GUA          | 9       | H3'     | 5.67           | 5705  |
| 2KOC  | ADE          | 4       | C6      | 159.6          | 5705  |
| 2KOC  | CYT          | 8       | H5''    | 2.73           | 5705  |



|      |     |    |     |         |       |
|------|-----|----|-----|---------|-------|
| 2KOC | GUA | 10 | C6  | 157     | 5705  |
| 2KOC | GUA | 10 | C2  | 162.5   | 5705  |
| 2KOC | GUA | 10 | C5  | 119.3   | 5705  |
| 2L1V | GUA | 6  | C8  | 133     | 17106 |
| 2L1V | CYT | 10 | H4' | 4.84    | 17106 |
| 2L1V | URA | 11 | H2' | 4.88    | 17106 |
| 2L1V | GUA | 13 | C8  | 133     | 17106 |
| 2L1V | ADE | 16 | C4' | 87.27   | 17106 |
| 2L1V | CYT | 20 | H2' | 5.01    | 17106 |
| 2L1V | URA | 22 | H4' | 3.15    | 17106 |
| 2L1V | URA | 22 | H5" | 3.77    | 17106 |
| 2L1V | URA | 22 | C1' | 95.97   | 17106 |
| 2L1V | URA | 24 | H4' | 4.82    | 17106 |
| 2L1V | URA | 24 | C4' | 80.45   | 17106 |
| 2L1V | ADE | 25 | C3' | 80.24   | 17106 |
| 2L1V | URA | 26 | H2' | 2.8     | 17106 |
| 2L1V | URA | 26 | H6  | 6.69    | 17106 |
| 2L1V | CYT | 33 | C5' | 97.47   | 17106 |
| 2LDL | ADE | 7  | C2  | 147.93  | 17671 |
| 2LDL | URA | 8  | C2' | 82.27   | 17671 |
| 2LHP | URA | 22 | H5' | 5.772   | 17860 |
| 2LHP | ADE | 12 | H5' | 5.868   | 17860 |
| 2LI4 | URA | 19 | H1' | 3.816   | 17877 |
| 2LI4 | URA | 19 | H1' | 3.816   | 17877 |
| 2LI4 | URA | 19 | H1' | 3.816   | 17877 |
| 2LI4 | URA | 19 | H1' | 3.816   | 17877 |
| 2LI4 | URA | 19 | H1' | 3.816   | 17877 |
| 2LI4 | URA | 19 | H1' | 3.816   | 17877 |
| 2LI4 | URA | 19 | H1' | 3.816   | 17877 |
| 2LI4 | URA | 19 | H1' | 3.816   | 17877 |
| 2LI4 | URA | 19 | H1' | 3.816   | 17877 |
| 2LK3 | URA | 9  | H5" | 4.637   | 17972 |
| 2LQZ | CYT | 4  | H5' | 7.17    | 18336 |
| 2LQZ | URA | 5  | H3' | 7.826   | 18336 |
| 2LQZ | CYT | 16 | C1' | 86.483  | 18336 |
| 2LQZ | URA | 15 | C5  | 107.841 | 18336 |
| 2LQZ | URA | 15 | C6  | 145.633 | 18336 |
| 2LU0 | GUA | 27 | H5' | 5.771   | 18503 |
| 2LU0 | GUA | 19 | H1' | 3.689   | 18503 |
| 2LU0 | GUA | 32 | C1' | 94.54   | 18503 |
| 2LUB | GUA | 21 | H5" | 4.678   | 18515 |
| 2LUB | GUA | 2  | H5' | 5.771   | 18515 |
| 2LUN | URA | 14 | C2  | 155.84  | 18532 |
| 2LUN | GUA | 8  | C2  | 154.36  | 18532 |
| 2LUN | GUA | 16 | C6  | 162.35  | 18532 |
| 2LUN | CYT | 15 | H5  | 6.33    | 18532 |
| 2LUN | CYT | 15 | H5' | 3.52    | 18532 |
| 2LUN | CYT | 15 | C2  | 160.81  | 18532 |
| 2LUN | CYT | 27 | C2  | 155.72  | 18532 |
| 2LUN | URA | 20 | C3' | 70.4    | 18532 |
| 2LV0 | GUA | 1  | C8  | 143.88  | 18549 |
| 2LV0 | ADE | 16 | H3' | 4.09    | 18549 |
| 2LV0 | URA | 8  | C2  | 152.38  | 18549 |

|      |     |    |     |        |       |
|------|-----|----|-----|--------|-------|
| 2LV0 | ADE | 16 | H2' | 3.88   | 18549 |
| 2LV0 | GUA | 1  | C3' | 70.2   | 18549 |
| 2LV0 | ADE | 16 | C3' | 69.84  | 18549 |
| 2LX1 | GUA | 6  | H2' | 6.14   | 18656 |
| 2LX1 | ADE | 5  | H5' | 2.803  | 18656 |
| 2M21 | URA | 11 | H5' | 3.824  | 18891 |
| 2M22 | ADE | 6  | H2  | 8.558  | 18892 |
| 2M24 | GUA | 8  | C2' | 72.449 | 18894 |
| 2M8K | GUA | 1  | H8  | 8.362  | 19260 |
| 2M8K | ADE | 12 | H8  | 8.673  | 19260 |
| 2M8K | CYT | 30 | C4' | 85.99  | 19260 |
| 2M8K | GUA | 36 | C4' | 86.07  | 19260 |
| 2M8K | CYT | 22 | C2' | 71.69  | 19260 |
| 2M8K | ADE | 24 | H2  | 6.377  | 19260 |
| 2M8K | ADE | 39 | H8  | 7.149  | 19260 |
| 2M8K | URA | 43 | H5  | 4.898  | 19260 |
| 2M8K | ADE | 38 | C5' | 69.17  | 19260 |
| 2MHI | GUA | 21 | H5' | 3.818  | 19634 |
| 2MHI | GUA | 22 | H4' | 4.687  | 19634 |
| 2MI0 | URA | 35 | C3' | 79.366 | 19662 |
| 2MI0 | ADE | 36 | C1' | 95.324 | 19662 |
| 2MI0 | CYT | 34 | H6  | 6.951  | 19662 |
| 2MI0 | URA | 35 | H5  | 6.171  | 19662 |
| 2MIS | URA | 5  | H1' | 7.1    | 19692 |
| 2MIS | GUA | 17 | C5' | 70.25  | 19692 |
| 2MIS | CYT | 7  | H1' | 7.39   | 19692 |
| 2MIS | ADE | 8  | H1' | 7.63   | 19692 |
| 2MIS | GUA | 9  | H1' | 7.29   | 19692 |
| 2QH3 | CYT | 7  | C3' | 81.628 | 7404  |
| 2QH4 | CYT | 18 | C6  | 146.4  | 7405  |
| 2QH4 | ADE | 8  | C2  | 157.24 | 7405  |
| 2QH4 | GUA | 9  | H5" | 3.833  | 7405  |
| 2RN1 | URA | 7  | C4' | 94.42  | 11014 |
| 2RN1 | GUA | 4  | H2' | 3.256  | 11014 |
| 2RN1 | GUA | 11 | H8  | 6.64   | 11014 |
| 2RN1 | URA | 6  | H6  | 8.46   | 11014 |
| 2Y95 | ADE | 6  | C5  | 120.7  | 16714 |
| 2Y95 | GUA | 12 | C5  | 118.2  | 16714 |
| 2Y95 | ADE | 6  | C6  | 157    | 16714 |

---

**Table S4. Timing.** LARMOR<sup>D</sup> execution times for RNA in the testing set. Calculations were carried out on Intel Xeon 2.83 GHz processor.

| PDBID | BMRB  | #shifts | Time (s) |
|-------|-------|---------|----------|
| 1SCL  | --    | 319     | 0.31     |
| 1XHP  | 6320  | 425     | 0.43     |
| 1Z2J  | 6543  | 337     | 0.50     |
| 1ZC5  | 6633  | 585     | 0.71     |
| 2JWV  | 15538 | 408     | 0.37     |
| 2K63  | 15856 | 261     | 0.26     |
| 2K64  | 15857 | 312     | 0.34     |
| 2K65  | 15858 | 128     | 0.08     |
| 2K66  | 15859 | 203     | 0.16     |
| 2LI4  | 17877 | 231     | 0.30     |
| 2LPS  | 5962  | 309     | 0.37     |
| 2LQZ  | 18336 | 246     | 0.23     |
| 2LUN  | 18532 | 381     | 0.33     |
| 2LX1  | 18656 | 141     | 0.11     |
| 2M12  | 18838 | 269     | 0.23     |
| 2M21  | 18891 | 304     | 0.23     |
| 2M22  | 18892 | 325     | 0.25     |
| 2M23  | 18893 | 320     | 0.37     |
| 2M24  | 18894 | 286     | 0.27     |
| 2M8K  | 19260 | 517     | 0.74     |
| 2MEQ  | 18975 | 275     | 0.17     |
| 2MHI  | 19634 | 722     | 1.15     |
| 2MI0  | 19662 | 372     | 0.52     |
| 2MIS  | 19692 | 367     | 0.30     |
| 2QH2  | 7403  | 291     | 0.23     |
| 2QH3  | 7404  | 289     | 0.22     |
| 2QH4  | 7405  | 252     | 0.15     |

**Table S5. Comparing accuracy of LARMOR<sup>D</sup>, SHIFTS and NUCHEMICS:** The mean absolute error (MAE) and Pearson correlation coefficient (*R*) between measured and LARMOR<sup>D</sup>, SHIFTS and NUCHEMICS predicted <sup>1</sup>H chemical shifts. Results correspond to those obtained using the testing set (**Table S2**).

| nucleus | MAE (ppm)           |        |           | <i>R</i>            |        |           |
|---------|---------------------|--------|-----------|---------------------|--------|-----------|
|         | LARMOR <sup>D</sup> | SHIFTS | NUCHEMICS | LARMOR <sup>D</sup> | SHIFTS | NUCHEMICS |
| H1'     | 0.18                | 0.32   | 0.25      | 0.42                | 0.20   | 0.33      |
| H2'     | 0.14                | --     | 0.26      | 0.66                | --     | 0.33      |
| H3'     | 0.12                | 0.30   | 0.16      | 0.46                | 0.38   | 0.40      |
| H4'     | 0.09                | 0.53   | 0.11      | 0.48                | 0.16   | 0.48      |
| H5'     | 0.17                | 0.65   | 0.16      | 0.17                | 0.24   | 0.37      |
| H5''    | 0.13                | 0.34   | 0.15      | 0.16                | 0.18   | 0.26      |
| H2      | 0.24                | 0.35   | 0.34      | 0.64                | 0.71   | 0.71      |
| H5      | 0.15                | 0.27   | 0.26      | 0.69                | 0.58   | 0.54      |
| H6      | 0.11                | 0.28   | 0.21      | 0.61                | 0.53   | 0.54      |
| H8      | 0.18                | 0.32   | 0.23      | 0.77                | 0.44   | 0.71      |
| mean    | 0.15                | 0.37   | 0.21      | 0.51                | 0.38   | 0.46      |

**Table S6. Reference Chemical Shifts:** Listed are the reference chemical shifts used by LARMOR<sup>D</sup>.

| Residue | Nucleus | Reference (ppm) |
|---------|---------|-----------------|
| GUA     | H5''    | 3.58            |
| GUA     | C3'     | 73.90           |
| GUA     | C1'     | 93.10           |
| GUA     | C5'     | 66.30           |
| GUA     | C4'     | 83.10           |
| GUA     | C2'     | 76.30           |
| GUA     | H2'     | 4.02            |
| GUA     | H1'     | 5.05            |
| GUA     | H4'     | 4.00            |
| GUA     | H8      | 7.69            |
| GUA     | H5'     | 3.78            |
| GUA     | H3'     | 4.14            |
| GUA     | C8      | 137.90          |
| ADE     | H4'     | 4.00            |
| ADE     | H8      | 8.60            |
| ADE     | H5'     | 3.78            |
| ADE     | H3'     | 4.14            |
| ADE     | H2      | 8.68            |
| ADE     | C8      | 141.20          |
| ADE     | C3'     | 73.90           |
| ADE     | C1'     | 93.10           |
| ADE     | C5'     | 66.30           |
| ADE     | H5''    | 3.58            |
| ADE     | C4'     | 83.10           |
| ADE     | C2'     | 76.30           |
| ADE     | C2      | 154.30          |
| ADE     | H2'     | 4.02            |
| ADE     | H1'     | 5.03            |
| URA     | H4'     | 4.00            |
| URA     | H5'     | 3.78            |
| URA     | H3'     | 4.14            |
| URA     | C3'     | 73.90           |
| URA     | C1'     | 93.10           |
| URA     | H5      | 5.95            |
| URA     | C6      | 142.00          |
| URA     | C5'     | 66.30           |
| URA     | H5''    | 3.58            |
| URA     | C4'     | 83.10           |
| URA     | C2'     | 76.30           |
| URA     | H6      | 7.85            |
| URA     | H2'     | 4.02            |
| URA     | C5      | 103.50          |
| URA     | H1'     | 5.60            |
| CYT     | H4'     | 4.00            |
| CYT     | H5'     | 3.78            |
| CYT     | H3'     | 4.14            |
| CYT     | H6      | 7.80            |
| CYT     | C3'     | 73.90           |
| CYT     | C1'     | 93.10           |
| CYT     | H5      | 6.20            |

|     |      |        |
|-----|------|--------|
| CYT | C5'  | 66.30  |
| CYT | H5'' | 3.58   |
| CYT | C4'  | 83.10  |
| CYT | C2'  | 76.30  |
| CYT | H2'  | 4.02   |
| CYT | C6   | 142.20 |
| CYT | C5   | 98.20  |
| CYT | H1'  | 5.28   |

**Table S7. Imino  $^1\text{H}$  and  $^{15}\text{N}$  Chemical Shifts:** In addition to predictors for non-exchangeable  $^1\text{H}$  and protonated  $^{13}\text{C}$ , predictors were also generated for imino  $^1\text{H}$  and  $^{15}\text{N}$  nuclei. However, *because of the paucity of imino chemical shifts in the training database, and uncertainties about the referencing of imino  $^{15}\text{N}$ , these predictors should be considered “experimental” and “tentative”.* The table below summarizes the results of the application of the imino predictors to the testing set.

| nucleus | MAE<br>(ppm) | R    |
|---------|--------------|------|
| H1      | 0.37         | 0.85 |
| H3      | 0.46         | 0.77 |
| N1      | 1.30         | 0.29 |
| N3      | 1.34         | 0.54 |

**Table S8. Comparing the accuracy of measured and predicted chemical for the U6 ISL RNA:** The mean absolute error (MAE) and Pearson correlation coefficient ( $R$ ) between measured and LARMOR<sup>D</sup> predicted  $^1\text{H}$  and  $^{13}\text{C}$  chemical shifts. Shown are the mean MAE and  $R$  for  $^1\text{H}$  and  $^{13}\text{C}$  chemical shifts, respectively. Analysis was restricted to chemical shifts for the region spanning residues 65-69 and 77-82. Results are shown for the pH 5.7 NMR structure (1SYZ), the pH 7.0 NMR structure (1SY4), the five CS-MD structures in Fig. 5D and the five MD structure in Fig. 5E.

|        | MAE (ppm)    |                 | $R$          |                 |
|--------|--------------|-----------------|--------------|-----------------|
|        | $^1\text{H}$ | $^{13}\text{C}$ | $^1\text{H}$ | $^{13}\text{C}$ |
| 1SYZ   | 0.19         | 1.19            | 0.29         | 0.74            |
| 1SY4   | 0.15         | 0.94            | 0.50         | 0.79            |
| CS-MD1 | 0.12         | 0.52            | 0.69         | 0.90            |
| CS-MD2 | 0.14         | 0.63            | 0.69         | 0.85            |
| CS-MD3 | 0.14         | 0.71            | 0.63         | 0.86            |
| CS-MD4 | 0.13         | 0.73            | 0.60         | 0.82            |
| CS-MD5 | 0.13         | 0.64            | 0.64         | 0.88            |
| MD1    | 0.20         | 0.88            | 0.39         | 0.58            |
| MD2    | 0.20         | 0.96            | 0.35         | 0.66            |
| MD3    | 0.19         | 0.98            | 0.27         | 0.78            |
| MD4    | 0.16         | 0.87            | 0.40         | 0.83            |
| MD5    | 0.18         | 0.97            | 0.29         | 0.63            |

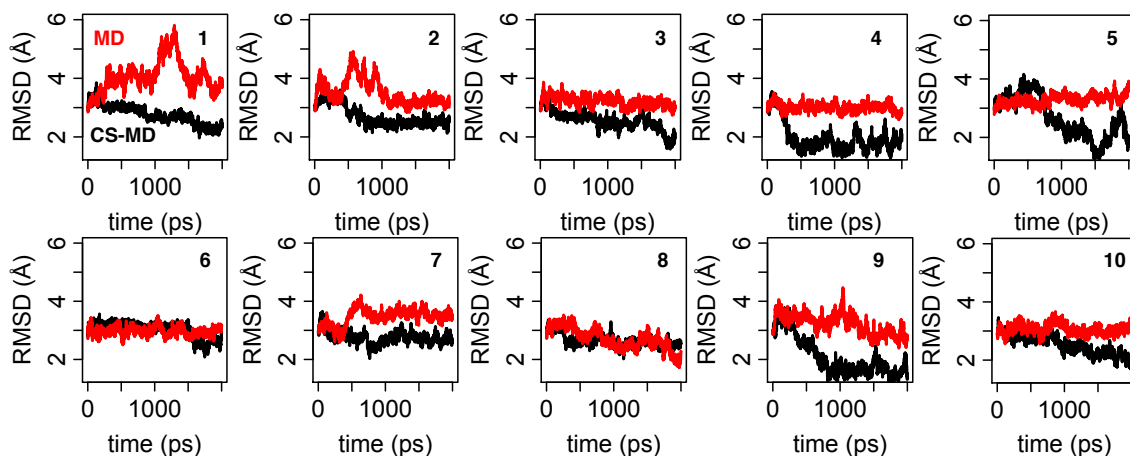

**Figure S1. CS-MD and MD Simulations of U6 ISL RNA:** Shown are the RMSD time series for the set 10 independent CS-MD (black) and MD (red) simulations of the U6 ISL RNA. RMSD were calculated relative to the first model of pH 7.0 NMR bundle (PDB: 1SY4) and for region spanning residues 65-69 and 77-82.

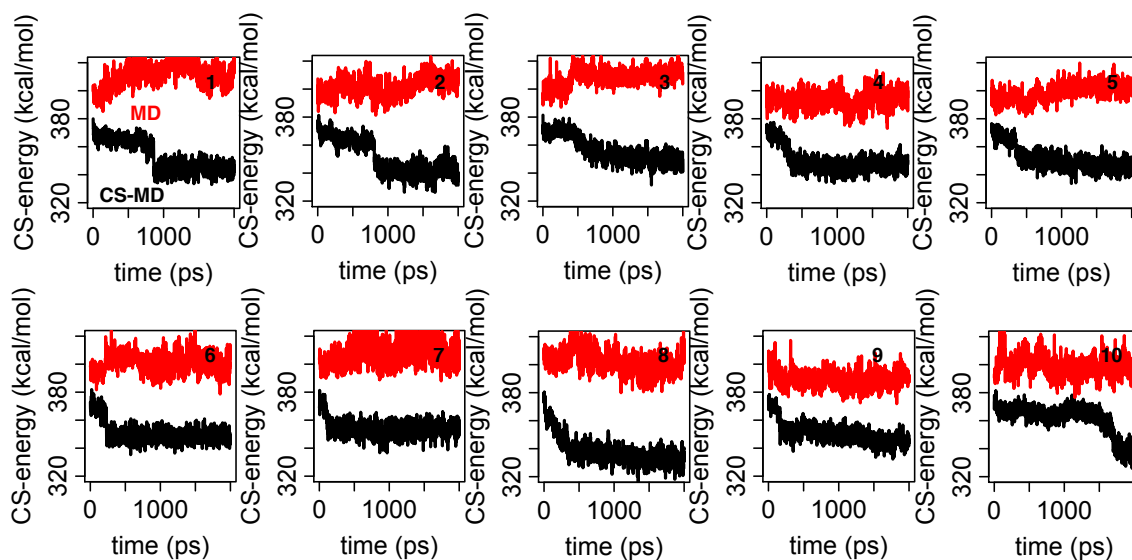

**Figure S2. CS-MD and MD Simulations of U6 ISL RNA:** Shown are the effective chemical shift error time series for the set 10 independent CS-MD (black) and MD (red) simulations of the U6 ISL RNA.
